# Supplementary material for: Investigating the Relationship between Instructors’ Use of Active-Learning Strategies and Students’ Conceptual Understanding and Affective Changes in Introductory Biology: A Comparison of Two Active-Learning Environments
Source: Atypon-hosted journal article supplement (doi:10.1187/cbe.16-06-0181), 2017-04-08
Supplement: combinedsupmats.pdf [file combinedsupmats.pdf]

# Supplemental Material

*CBE—Life Sciences Education*

Cleveland *et al.*

Examples of Graphic Organizers and Worksheets used in Matthew's Section of Principles of Biology

|                                                     | What goes into the process or reaction?       | What happens (big picture)?                                                                                                                                     | What products are created?                                                                    | Net ATP produced |
|-----------------------------------------------------|-----------------------------------------------|-----------------------------------------------------------------------------------------------------------------------------------------------------------------|-----------------------------------------------------------------------------------------------|------------------|
| <b>Glycolysis</b><br>CYTOSOL ←!                     | - Glucose<br>- 2 molecules of ATP             | - Glucose is converted to pyruvate                                                                                                                              | - 2 pyruvate<br>- 4 ATP (substrate level phosphorylation)<br>- NADH (2)                       | 2                |
| <b>Pyruvate Breakdown</b><br>MITOCHONDRIA<br>MATRIX | - Pyruvate                                    | - CO <sub>2</sub> from pyruvate removed<br>- Joins to acetyl + CoA to form acetyl-CoA<br>* done by pyruvate dehydrogenase                                       | - 2 NADH<br>- Acetyl-CoA (2)                                                                  | ∅                |
| <b>Krebs Cycle</b><br>MATRIX                        | - Acetyl-CoA                                  | - Acetyl attaches to oxaloacetate to form citric acid.<br>- Krebs cycle carried out <u>care of various enzymes</u><br>- Oxaloacetate regenerated per acetyl-CoA | - 2 CO <sub>2</sub><br>- 1 ATP (substrate-level phosph.)<br>- 3 NADH<br>- 1 FADH <sub>2</sub> | 2                |
| <b>Oxidative Phosphorylation</b><br>MATRIX          | - NADH & FADH <sub>2</sub> from previous step | - NADH & FADH <sub>2</sub> fed into electron transport chain<br>- H <sup>+</sup> gradient is formed<br>- gradient used to fuel ATP production                   | 30-34 ATP (chemiosmosis)                                                                      | 30-34            |
|                                                     |                                               |                                                                                                                                                                 |                                                                                               | TOTAL: 34-38     |

**Figure S1.** Graphic organizer used to compare and contrast the various processes involved in aerobic cellular respiration.

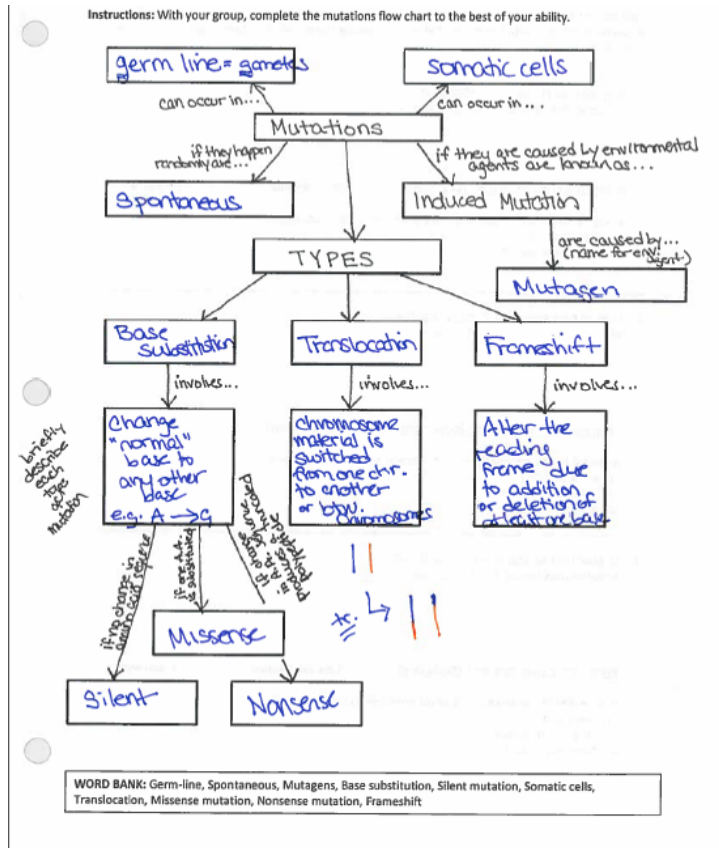

**Figure S2.** Worksheet used to describe and compare various types of mutations.
